# Supplementary material for: A genomic hotspot of diversifying selection and structural change in the hoary bat (Lasiurus cinereus)
Source: PeerJ. 2024 May 31;12:e17482. doi: 10.7717/peerj.17482 (PMC11146322; doi:10.7717/peerj.17482)
Supplement: Supplemental Information 10 — Program outputs are shaded in blue. P-values less than 0.01 are bolded. The first column indicates whether the gene was found to have significant evidence of diversifying selection in previous work, as discussed in the text. A separate sheet of output is given for each tree analyzed (see text for details). The final sheet gives the tree and PAML output for the Trpc4 gene comparison between bats and carnivores. [file peerj-12-17482-s010.xlsx]

## Sheet: tree1
Supplemental File S2. Tests of positive selection on coding sequence for the specified genes. The first four pages contain results for the same tests but using one of four different guide trees described in the Materials and Methods. The final page contains output specific to a post-hoc test of selection on Trpc4 described in the text.
				Null model for branch-specific positive selection	Lasiurus branch as foreground	Lasiurus branch as foreground		Lasiurus branch as foreground		Lasiurus branch as foreground
Gene symbol	Previously identified selection candidates	Block	Alignment	lnL: Model=0, NSsites=0	lnL: Model=2, NSsites=0	Adjusted P-value, branch model	Background ω	Foreground ω	Adjusted BUSTED p-value	Adjusted aBSREL p-value
Amer3	y		2196	-11606.9	-11599.2	0.000262692	0.312722	0.724104	0.0111826	1
Cecr2	y	CE	4083	-17895	-17887.3	0.000262692	0.219399	0.477921	0.0237583	1
Cecr6	y	CE	1545	-6567.52	-6557.12	4.10398e-05	0.138611	0.409219	0.0812971	1
Fgf9	y		624	-1467.96	-1462.33	0.00209712	0.00302671	0.374248	0.5	1
Frem2	y	NF	9357	-41738.7	-41719.2	1.29628e-08	0.144938	0.353221	6.6936e-07	0.321786
Mical3	y	CE	5529	-22368.8	-22362.1	0.000762225	0.167197	0.313701	0.462975	0.200334
Periostin	y	NF	2460	-8688.52	-8679.99	0.000176991	0.0583511	0.246776	0.0237583	0.447451
Proser1	y	NF	2502	-11209.3	-11201.3	0.000245533	0.201852	0.613027	0.00571876	0.0897726
Sacs	y		13389	-47422.3	-47411.1	2.43647e-05	0.0832408	0.181658	8.50342e-12	1
Slc25a18	y	CE	561	-2305.16	-2296.7	0.000176991	0.160495	2.23378	0.5	1
Alg5		NF	747	-3167.75	-3167.74	0.954114	0.124831	0.13945	0.0812971	1
Atp6v1e1		CE	678	-1852	-1850.98	0.288236	0.0496367	0.0001	0.5	1
Bcl2l13		CE	1164	-4528.87	-4528.87	0.992182	0.280275	0.279185	0.5	1
Ccna1		NF	1167	-5422.3	-5421.37	0.30668	0.137871	0.266622	0.0812971	1
Cog6		NF	1797	-6466.07	-6465.5	0.397695	0.0530637	0.0973012	0.0446048	1
Dclk1		NF	2121	-6276.26	-6274.32	0.105194	0.0180036	0.0547138	0.201612	0.0443804
Exosc8		NF	753	-2588.51	-2585.72	0.041253	0.0762263	0.383042	0.5	1
Foxo1		NF	1695	-6126.25	-6125.65	0.39435	0.057242	0.0993817	0.5	1
Hdhd5		CE	1125	-4230.8	-4230.74	0.799706	0.158966	0.191152	0.355833	1
Il17ra		CE	2229	-10733.4	-10729.4	0.0118182	0.254414	0.488976	0.5	1
Lhfpl6		NF	597	-1957.44	-1957.34	0.7415	0.0476393	0.0302302	0.5	1
Mab21l1		NF	1077	-2999.77	-2999.6	0.709378	0.00214839	0.0001	0.5	1
Nbea		NF	8343	-28138	-28125.9	1.42078e-05	0.0331679	0.123429	0.5	1
Nhlrc3		NF	939	-4080.02	-4079.88	0.733033	0.196723	0.144384	0.0812971	1
Pex26		CE	867	-3773.51	-3773.39	0.7415	0.394854	0.323897	0.5	1
Rfxap		NF	687	-2809.18	-2808.53	0.39088	0.104478	0.17978	0.5	1
Smad9		NF	1080	-4432.74	-4432.02	0.36935	0.0257059	0.0352623	0.201612	0.311397
Spart		NF	1977	-8726.56	-8725.23	0.205751	0.128767	0.232679	0.027568	1
Supt20h		NF	2187	-7073.73	-7073.25	0.437091	0.124359	0.184495	0.027568	0.0897726
Trpc4		NF	2406	-9860.31	-9851.22	0.000128455	0.065579	0.238844	0.5	1
Tuba8		CE	1344	-3897.19	-3897.19	0.955345	0.0144469	0.0159546	0.5	1
Usp18		CE	897	-3896.56	-3895.69	0.314796	0.274808	0.506138	0.5	1
Ada2		CE (deleted in multiple subspecies)	NA	NA	NA	NA	NA	NA	NA	NA
Bid		CE (fragment in L. cinereus)	NA	NA	NA	NA	NA	NA	NA	NA
Sertm1		NF (deleted in multiple species)	NA	NA	NA	NA	NA	NA	NA	NA
Sohlh2		NF (incomplete in multiple species)	NA	NA	NA	NA	NA	NA	NA	NA
Stoml3		NF (deleted in multiple species)	NA	NA	NA	NA	NA	NA	NA	NA
Ufm1		NF (too short)	NA	NA	NA	NA	NA	NA	NA	NA

## Sheet: tree2
				Null model for branch-specific positive selection	Lasiurus branch as foreground	Lasiurus branch as foreground		Lasiurus branch as foreground		Lasiurus branch as foreground
Gene symbol	Previously identified selection candidates	Block	Alignment	lnL: Model=0, NSsites=0	lnL: Model=2, NSsites=0	Adjusted P-value, branch model	Background ω	Foreground ω	Adjusted BUSTED p-value	Adjusted aBSREL p-value
Amer3	y		2196	-11606.3	-11597.6	0.000138898	0.313043	0.783547	0.00872913	1
Cecr2	y	CE	4083	-17899.5	-17891.4	0.000201617	0.219602	0.483479	0.0221067	0.122699
Cecr6	y	CE	1545	-6566.88	-6555.64	2.2688e-05	0.138949	0.441911	0.0746829	1
Fgf9	y		624	-1472.42	-1466.77	0.00206747	0.00298006	0.370986	0.5	1
Frem2	y	NF	9357	-41763.8	-41744.5	1.67366e-08	0.145223	0.353896	1.144e-06	0.178907
Mical3	y	CE	5529	-22367.8	-22361.3	0.000905219	0.167481	0.314415	0.0746829	0.14445
Periostin	y	NF	2460	-8681.51	-8672.74	0.000138898	0.0583524	0.26831	0.0178397	0.308533
Proser1	y	NF	2502	-11209.4	-11201.5	0.000232185	0.201754	0.601971	0.00570941	0.0967158
Sacs	y		13389	-47439.6	-47429.2	3.84772e-05	0.083184	0.177582	9.856e-12	1
Slc25a18	y	CE	561	-2305.16	-2296.7	0.000154838	0.160495	2.2338	0.5	0.891447
Alg5		NF	747	-3167.75	-3167.74	0.955684	0.124831	0.139448	0.0744451	1
Atp6v1e1		CE	678	-1852	-1850.98	0.289002	0.0496367	0.0001	0.5	1
Bcl2l13		CE	1164	-4528.87	-4528.87	1	0.280275	0.279185	0.5	1
Ccna1		NF	1167	-5422.3	-5421.37	0.289002	0.137871	0.266667	0.0720966	1
Cog6		NF	1797	-6461.19	-6460.91	0.635239	0.0530029	0.082227	0.042912	1
Dclk1		NF	2121	-6278.85	-6276.34	0.0533239	0.0181204	0.0633923	0.209496	0.0452956
Exosc8		NF	753	-2588.51	-2585.72	0.041253	0.0762263	0.383042	0.5	1
Foxo1		NF	1695	-6135.94	-6135.13	0.322386	0.0580472	0.109672	0.5	1
Hdhd5		CE	1125	-4233.6	-4233.45	0.746206	0.159552	0.212811	0.370851	1
Il17ra		CE	2229	-10726.6	-10723.2	0.0227786	0.254546	0.467418	0.5	1
Lhfpl6		NF	597	-1960.66	-1960.54	0.749104	0.0474392	0.0293096	0.5	1
Mab21l1		NF	1077	-3004.3	-3004.13	0.741489	0.00210909	0.0001	0.5	1
Nbea		NF	8343	-28143.6	-28131	8.34493e-06	0.0331843	0.12621	0.5	1
Nhlrc3		NF	939	-4079.69	-4079.59	0.760256	0.196549	0.152169	0.0746829	1
Pex26		CE	867	-3773.51	-3773.39	0.749104	0.394854	0.323897	0.5	1
Rfxap		NF	687	-2811.4	-2810.91	0.496243	0.106382	0.173657	0.5	1
Smad9		NF	1080	-4430.99	-4435.88	1	0.0257863	0.00341166	0.187612	0.215533
Spart		NF	1977	-8730.21	-8729.19	0.289002	0.128871	0.217726	0.0323916	1
Supt20h		NF	2187	-7073.9	-7073.45	0.498951	0.124354	0.182062	0.0218444	0.0942025
Trpc4		NF	2406	-9861.13	-9852.43	0.000138898	0.0655654	0.229531	0.5	1
Tuba8		CE	1344	-3896.52	-3896.51	0.955684	0.0144643	0.0166334	0.5	1
Usp18		CE	897	-3897.75	-3896.8	0.289002	0.275735	0.520838	0.5	1
Ada2		CE (deleted in multiple subspecies)	NA	NA	NA	NA	NA	NA	NA	NA
Bid		CE (fragment in L. cinereus)	NA	NA	NA	NA	NA	NA	NA	NA
Sertm1		NF (deleted in multiple species)	NA	NA	NA	NA	NA	NA	NA	NA
Sohlh2		NF (incomplete in multiple species)	NA	NA	NA	NA	NA	NA	NA	NA
Stoml3		NF (deleted in multiple species)	NA	NA	NA	NA	NA	NA	NA	NA
Ufm1		NF (too short)	NA	NA	NA	NA	NA	NA	NA	NA

## Sheet: tree3
				Null model for branch-specific positive selection	Lasiurus branch as foreground	Lasiurus branch as foreground		Lasiurus branch as foreground		Lasiurus branch as foreground
Gene symbol	Previously identified selection candidates	Block	Alignment	lnL: Model=0, NSsites=0	lnL: Model=2, NSsites=0	Adjusted P-value, branch model	Background ω	Foreground ω	Adjusted BUSTED p-value	Adjusted aBSREL p-value
Amer3	y		2196	-11609.4	-11601.6	0.000253229	0.309947	0.716987	0.0132151	1
Cecr2	y	CE	4083	-17874.3	-17866.4	0.000248599	0.218442	0.478347	0.000424859	0.148709
Cecr6	y	CE	1545	-6573.68	-6562.43	1.67986e-05	0.135067	0.415828	0.10354	1
Fgf9	y		624	-1452.95	-1447.35	0.00219844	0.0032253	0.389851	0.5	1
Frem2	y	NF	9357	-41780	-41760.4	1.19191e-08	0.145156	0.354532	4.20408e-07	0.27105
Mical3	y	CE	5529	-22386.5	-22379.4	0.000515805	0.165015	0.314857	0.0393991	0.148709
Periostin	y	NF	2460	-8692.61	-8684.11	0.000188946	0.0586212	0.247176	0.0235055	0.374602
Proser1	y	NF	2502	-11202.8	-11194.7	0.000233811	0.201069	0.612742	0.00431046	0.087737
Sacs	y		13389	-47541.8	-47530.5	1.67986e-05	0.0827912	0.181554	3.10862e-13	1
Slc25a18	y	CE	561	-2306.31	-2297.9	0.000188946	0.161999	2.23453	0.5	0.910173
Alg5		NF	747	-3166.6	-3166.59	0.944917	0.126387	0.140835	0.0934143	1
Atp6v1e1		CE	678	-1852.34	-1851.34	0.292827	0.0491573	0.0001	0.5	1
Bcl2l13		CE	1164	-4529.06	-4529.06	0.950154	0.283899	0.276942	0.5	1
Ccna1		NF	1167	-5428.51	-5427.57	0.303371	0.13773	0.267577	0.10354	1
Cog6		NF	1797	-6515.04	-6514.42	0.372732	0.0517875	0.0973566	0.376493	1
Dclk1		NF	2121	-6293.94	-6292.04	0.110508	0.0180035	0.0539181	0.0235055	0.0422611
Exosc8		NF	753	-2587.83	-2584.93	0.0364887	0.0740436	0.385163	0.5	1
Foxo1		NF	1695	-6123.18	-6122.57	0.372732	0.0566685	0.0987232	0.5	1
Hdhd5		CE	1125	-4244.4	-4244.34	0.796862	0.159124	0.191721	0.376493	1
Il17ra		CE	2229	-10743.1	-10738.9	0.00915127	0.249333	0.487992	0.5	1
Lhfpl6		NF	597	-1959.19	-1959.11	0.796862	0.045036	0.0299625	0.5	1
Mab21l1		NF	1077	-3003.38	-3003.2	0.705252	0.00215581	0.0001	0.5	1
Nbea		NF	8343	-28174.3	-28161.9	1.04193e-05	0.0326541	0.123787	0.5	1
Nhlrc3		NF	939	-4062.61	-4062.48	0.751935	0.195582	0.145359	0.0235055	1
Pex26		CE	867	-3765.78	-3765.71	0.796862	0.378963	0.323594	0.5	1
Rfxap		NF	687	-2821.83	-2821.21	0.372732	0.105442	0.179517	0.5	1
Smad9		NF	1080	-4442.3	-4441.5	0.330429	0.0250633	0.0351187	0.172649	0.241048
Spart		NF	1977	-8749.78	-8748.44	0.204279	0.12532	0.227154	0.0286183	1
Supt20h		NF	2187	-7084.02	-7083.52	0.427461	0.123864	0.184885	0.0235055	0.0796998
Trpc4		NF	2406	-9869.13	-9859.82	0.000101937	0.0645515	0.239366	0.5	1
Tuba8		CE	1344	-3898.11	-3898.1	0.944917	0.0143162	0.0160288	0.5	1
Usp18		CE	897	-3906.64	-3905.75	0.307029	0.274259	0.508444	0.5	1
Ada2		CE (deleted in multiple subspecies)	NA	NA	NA	NA	NA	NA	NA	NA
Bid		CE (fragment in L. cinereus)	NA	NA	NA	NA	NA	NA	NA	NA
Sertm1		NF (deleted in multiple species)	NA	NA	NA	NA	NA	NA	NA	NA
Sohlh2		NF (incomplete in multiple species)	NA	NA	NA	NA	NA	NA	NA	NA
Stoml3		NF (deleted in multiple species)	NA	NA	NA	NA	NA	NA	NA	NA
Ufm1		NF (too short)	NA	NA	NA	NA	NA	NA	NA	NA

## Sheet: tree4
				Null model for branch-specific positive selection	Lasiurus branch as foreground	Lasiurus branch as foreground		Lasiurus branch as foreground		Lasiurus branch as foreground
Gene symbol	Previously identified selection candidates	Block	Alignment	lnL: Model=0, NSsites=0	lnL: Model=2, NSsites=0	Adjusted P-value, branch model	Background ω	Foreground ω	Adjusted BUSTED p-value	Adjusted aBSREL p-value
Amer3	y		2196	-8553.19	-8547.73	0.00509382	0.405823	0.823872	0.40205	1
Cecr2	y	CE	4083	-11633.2	-11629.9	0.0365161	0.268066	0.445008	0.431314	0.3468
Cecr6	y	CE	1545	-5697.16	-5685.65	4.4404e-05	0.149409	0.453914	0.431314	1
Fgf9	y		624	-1240.18	-1235.5	0.0101553	0.00504331	0.37664	0.5	1
Frem2	y	NF	9357	-26365.8	-26361.7	0.0157585	0.23572	0.355789	0.5	0.4386
Mical3	y	CE	5529	-16263.9	-16258.1	0.00417236	0.183107	0.333689	0.5	0.2312
Periostin	y	NF	2460	-5628.85	-5625.91	0.0486347	0.111109	0.250758	0.5	1
Proser1	y	NF	2502	-6882.2	-6881.07	0.266245	0.321549	0.486264	0.40205	0.1462
Sacs	y		13389	-34164.9	-34157.7	0.00158274	0.0889862	0.16707	0	1
Slc25a18	y	CE	561	-1600.95	-1594.78	0.0035393	0.212435	2.15067	0.5	1
Alg5		NF	747	-1866.18	-1866.12	0.752473	0.163822	0.122033	0.5	1
Atp6v1e1		CE	678	-1353.29	-1351.93	0.226207	0.071113	0.0001	0.5	1
Bcl2l13		CE	1164	-3155.92	-3155.57	0.515981	0.367411	0.264782	0.5	1
Ccna1		NF	1167	-3547.22	-3547.22	0.933808	0.228156	0.219441	0.5	1
Cog6		NF	1797	-4760.17	-4759.72	0.482561	0.0532449	0.0915214	0.5	1
Dclk1		NF	2121	-4919.35	-4918.7	0.411757	0.0360042	0.0642254	0.1734	0.0374
Exosc8		NF	753	-1647.89	-1646.6	0.231703	0.10973	0.340744	0.5	1
Foxo1		NF	1695	-4580.03	-4579.68	0.515981	0.06415	0.0973116	0.5	1
Hdhd5		CE	1125	-3127.2	-3126.55	0.411757	0.197891	0.332677	0.5	1
Il17ra		CE	2229	-7768.53	-7765.72	0.0486347	0.293564	0.511108	0.5	1
Lhfpl6		NF	597	-1504.36	-1504.3	0.752473	0.0413506	0.0289354	0.5	1
Mab21l1		NF	1077	-2428.29	-2428.07	0.586205	0.00275097	0.0001	0.5	1
Nbea		NF	8343	-18955.4	-18944.4	4.4404e-05	0.0349305	0.118574	0.5	1
Nhlrc3		NF	939	-2503.52	-2502.47	0.279059	0.282837	0.122693	0.5	1
Pex26		CE	867	-2859.09	-2858.65	0.482561	0.453457	0.311398	0.5	1
Rfxap		NF	687	-2198.76	-2198.43	0.515981	0.211828	0.146487	0.5	1
Smad9		NF	1080	-3476.54	-3473.76	0.0486347	0.0639429	0.0327599	0.5	0.3672
Spart		NF	1977	-5151.82	-5151.55	0.548359	0.159959	0.208375	0.431314	1
Supt20h		NF	2187	-4802.91	-4802.35	0.445379	0.157423	0.234303	0.5	1
Trpc4		NF	2406	-6128.71	-6126.49	0.0856687	0.119166	0.223369	0.5	1
Tuba8		CE	1344	-3060.19	-3060.11	0.752473	0.025118	0.0170728	0.5	1
Usp18		CE	897	-2629.02	-2628.37	0.411757	0.3181	0.545606	0.5	1
Ada2		CE (deleted in multiple subspecies)	NA	NA	NA	NA	NA	NA	NA	NA
Bid		CE (fragment in L. cinereus)	NA	NA	NA	NA	NA	NA	NA	NA
Sertm1		NF (deleted in multiple species)	NA	NA	NA	NA	NA	NA	NA	NA
Sohlh2		NF (incomplete in multiple species)	NA	NA	NA	NA	NA	NA	NA	NA
Stoml3		NF (deleted in multiple species)	NA	NA	NA	NA	NA	NA	NA	NA
Ufm1		NF (too short)	NA	NA	NA	NA	NA	NA	NA	NA

## Sheet: trpc4 extended
Branch-labeled tree:	(((((Callorhinus,Odobenus),Phoca),Ursus),Meles),Vulpes,(Felis,(Hyaena,Suricata)),((((((Eptesicus#1,Pipistrellus#1)#1,Lasiurus#1)#1,Myotis#1)#1,Miniopterus#1)#1,Molossus#1)#1,(Phyllostomus#1,(Artibeus#1,Sturnira#1)#1)#1,(Hipposideros#1,Rhinolophus#1)#1,(Pteropus#1,Rousettus#1)#1)#1);
Alignment type	lnL: Model=0, NSsites=0	lnL: Model=2,NSsites=0	P-value
ITPR region	-6855.32	-6841.24	1.12241e-07
whole alignment	-12701.1	-12688.1	3.36228e-07
