# Supplementary material for: A genomic hotspot of diversifying selection and structural change in the hoary bat (Lasiurus cinereus)
Source: PeerJ. 2024 May 31;12:e17482. doi: 10.7717/peerj.17482 (PMC11146322; doi:10.7717/peerj.17482)
Supplement: Supplemental Information 11 — Other bat species used in evolutionary rate analysis were not included in this synteny comparison if the orthologous genes were not located on large linkage groups. Note that Mab21l1 is nested within an intron of Nbea and thus are both labeled as position “1” in the column “Human order”. The strand and the order in human are listed to aid the detection of structural changes. [file peerj-12-17482-s011.xlsx]

## Sheet: gene locations
Supplemental File S3. Clustering of selection candidates in the updated Lasiurus cinereus assembly, and their locations in eight other bat species and ten other tetrapod species. Other bat species used in evolutionary rate analysis were not included in this synteny comparison if the orthologous genes were not located on large linkage groups. Note that Mab21l1 is nested within an intron of Nbea an…
Outgroup tetrapods
	Homo sapiens	Begin	End	Strand	Symbol	Human order		Mus musculus	Begin	End	Strand	Symbol	Human order		Equus caballus	Begin	End	Strand	Symbol	Human order		Sus scrofa	Begin	End	Strand	Symbol	Human order		Bos taurus	Begin	End	Strand	Symbol	Human order		Ornithorhynchus anatinus	Begin	End	Strand	Symbol	Human order		Corvus cornix	Begin	End	Strand	Symbol	Human order
	NC_000002.12	130755540	130768134	+	AMER3			NC_000067.7	34617988	34630025	+	AMER3			NC_009161.3	420317	431252	+	AMER3			NC_010457.5	57035442	57047427	+	AMER3			NC_037329.1	1468938	1477015	+	AMER3			NC_041728.1	124227902	124342482	+	AMER3			NC_046339.1	21607232	21648510	+	AMER3
	NC_000013.11	21671073	21704498	+	FGF9			NC_000080.7	58308131	58350311	+	FGF9			NC_009160.3	2437970	2469608	+	FGF9			NC_010453.5	1554648	1581938	+	FGF9			NC_037339.1	35379638	35405463	-	FGF9			NC_041747.1	737065	764913	+	FGF9			NC_046332.1	45254656	45284514	+	FGF9
	NC_000013.11	23328830	23433702	-	SACS			NC_000080.7	61375870	61478142	+	SACS			NC_009160.3	4025832	4108825	-	SACS			NC_010453.5	2382406	2455756	-	SACS			NC_037339.1	34604329	34669670	+	SACS			NC_041747.1	1056658	1107521	-	SACS			NC_046332.1	45938584	45996671	-	SACS
	NC_000013.11	34942270	35672736	+	NBEA	1									NC_009160.3	13834696	14503192	+	NBEA	1		NC_010453.5	11085081	11722859	+	NBEA	1		NC_037339.1	25976904	25979336	+	MAB21L1	1		NC_041747.1	4711845	5107142	+	NBEA	1		NC_046332.1	50198982	50666651	+	NBEA	1
	NC_000013.11	35473789	35476689	-	MAB21L1	1		NC_000069.7	55689931	55692708	+	MAB21L1	1		NC_009160.3	14315028	14316946	-	MAB21L1	1		NC_010453.5	11518398	11521636	-	MAB21L1	1		NC_037339.1	25769095	26441665	-	NBEA	1		NC_041747.1	4976773	4978955	-	MAB21L1	1		NC_046332.1	50519115	50522132	-	MAB21L1	1
	NC_000013.11	35768652	36131939	-	DCLK1	3		NC_000069.7	55532616	56091169	-	NBEA	1		NC_009160.3	14589508	14967812	-	DCLK1	3		NC_010453.5	11815258	12159085	-	DCLK1	3		NC_037339.1	25340395	25695337	+	DCLK1	3		NC_041747.1	5142689	5347372	-	DCLK1	3		NC_046332.1	50715576	50957749	-	DCLK1	3
	NC_000013.11	36168217	36214556	-	SOHLH2	4		NC_000069.7	55149724	55446489	+	DCLK1	3		NC_009160.3	14965220	15013469	-	SOHLH2	4		NC_010453.5	12203100	12309725	-	SOHLH2	4		NC_037339.1	25262597	25303215	+	SOHLH2	4		NC_041747.1	5361143	5386132	-	SOHLH2	4		NC_046332.1				SOHLH2	4
	NC_000013.11	36301638	36370180	-	SPART	5		NC_000069.7	55089465	55117378	+	SOHLH2	4		NC_009160.3	15107382	15142472	-	SPART	5		NC_010453.5	12313211	12346226	-	SPART	5		NC_037339.1	25176436	25208300	+	SPART	5		NC_041747.1	5412893	5598104	-	SPART	5		NC_046332.1	51025150	51044933	-	SPART	5
	NC_000013.11	36431517	36442870	+	CCNA1	6		NC_000069.7	55019500	55044753	+	SPART	5		NC_009160.3	15204394	15216281	+	CCNA1	6		NC_010453.5	12396149	12405357	+	CCNA1	6		NC_037339.1	25107045	25118257	-	CCNA1	6		NC_041747.1	5466033	5478424	+	CCNA1	6		NC_046332.1	51078838	51085045	+	CCNA1	6
	NC_000013.11	36674020	36697839	+	SERTM1	7		NC_000069.7	54952890	54965055	-	CCNA1	6		NC_009160.3	15417164	15440244	+	SERTM1	7		NC_010453.5	12576593	12600665	+	SERTM1	7		NC_037339.1	24901133	24926099	-	SERTM1	7		NC_041747.1	5560048	5578299	+	SERTM1	7		NC_046332.1	51173010	51187618	+	SERTM1	7
	NC_000013.11	36819222	36829104	+	RFXAP	8		NC_000069.7	54804489	54823308	-	SERTM1	7		NC_009160.3	15591202	15597114	+	RFXAP	8		NC_010453.5	12660306	12695137	+	RFXAP	8		NC_037339.1	24805679	24815774	-	RFXAP	8		NC_041747.1	5598091	5605607	+	RFXAP	8		NC_046332.1	51225924	51237554	+	RFXAP	8
	NC_000013.11	36844831	36920854	-	SMAD9	9		NC_000069.7	54710536	54715212	-	RFXAP	8		NC_009160.3	15608367	15684734	-	SMAD9	9		NC_010453.5	12705652	12727981	-	SMAD9	9		NC_037339.1	24731865	24798685	+	SMAD9	9		NC_041747.1	5612801	5653123	-	SMAD9	9		NC_046332.1	51239011	51283307	-	SMAD9	9
	NC_000013.11	36949738	36999367	-	ALG5	10		NC_000069.7	54662873	54709162	+	SMAD9	9		NC_009160.3	15702909	15744695	-	ALG5	10		NC_010453.5	12777549	12815969	-	ALG5	10		NC_037339.1	24695170	24722644	+	ALG5	10		NC_041747.1	5658560	5686784	-	ALG5	10		NC_046332.1	51304550	51325598	-	ALG5	10
	NC_000013.11	37000786	37009614	+	EXOSC8	11		NC_000069.7	54642960	54657216	+	ALG5	10		NC_009160.3	15744897	15752031	+	EXOSC8	11		NC_010453.5	12817081	12825847	+	EXOSC8	11		NC_037339.1	24685656	24694910	-	EXOSC8	11		NC_041747.1	5687135	5694661	+	EXOSC8	11		NC_046332.1	51325147	51334793	+	EXOSC8	11
	NC_000013.11	37009312	37059688	-	SUPT20H	12		NC_000069.7	54636099	54642469	-	EXOSC8	11		NC_009160.3	15751952	15791350	-	SUPT20H	12		NC_010453.5	12825758	12864935	-	SUPT20H	12		NC_037339.1	24646264	24685744	+	SUPT20H	12		NC_041747.1	5694572	5724613	-	SUPT20H	12		NC_046332.1	51334722	51364738	-	SUPT20H	12
	NC_000013.11	37562585	37598768	-	POSTN	13		NC_000069.7	54600181	54636184	+	SUPT20	12		NC_009160.3	16271879	16305258	-	POSTN	13		NC_010453.5	13225183	13258973	-	POSTN	13		NC_037339.1	24219116	24254425	+	POSTN	13		NC_041747.1	5869730	5912958	-	POSTN	13		NC_046332.1	51581274	51613033	-	POSTN	13
	NC_000013.11	37632063	37869772	-	TRPC4	14		NC_000069.7	54266688	54298462	+	POSTN	13		NC_009160.3	16346096	16556859	-	TRPC4	14		NC_010453.5	13300288	13519001	-	TRPC4	14		NC_037339.1	23965289	24173431	+	TRPC4	14		NC_041747.1	5938092	6053134	-	TRPC4	14		NC_046332.1	51638863	51772841	-	TRPC4	14
	NC_000013.11	38349851	38363619	+	UFM1	15		NC_000069.7	54063441	54225892	+	TRPC4	14		NC_009160.3	16991457	17005622	+	UFM1	15		NC_010453.5	13516814	13779446	+	UFM1	15		NC_037339.1	23680671	23695013	-	UFM1	15		NC_041747.1	6166481	6177260	+	UFM1	15		NC_046332.1	51984987	51993556	+	UFM1	15
	NC_000013.11	38687077	38887131	+	FREM2	16		NC_000069.7	53760797	53771228	-	UFM1	15		NC_009160.3	17301481	17465859	+	FREM2	16		NC_010453.5	13775267	14116377	+	FREM2	16		NC_037339.1	23296800	23449142	-	FREM2	16		NC_041747.1	6290552	6363881	+	FREM2	16		NC_046332.1	52107839	52227582	+	FREM2	16
	NC_000013.11	38965925	38990831	-	STOML3	17		NC_000069.7	53421359	53566014	-	FREM2	16		NC_009160.3	17481587	17493882	-	STOML3	17		NC_010453.5	14131203	14151361	-	STOML3	17		NC_037339.1	23258105	23285134	+	STOML3	17		NC_041747.1	6367564	6372954	+	STOML3*	17		NC_046332.1	52289502	52298477	-	STOML3	17
	NC_000013.11	39009865	39038089	-	PROSER1	18		NC_000069.7	53396128	53416284	+	STOML3	17		NC_009160.3	17509089	17536122	-	PROSER1	18		NC_010453.5	14152198	14183846	-	PROSER1	18		NC_037339.1	23219427	23251157	+	PROSER1	18		NC_041747.1	6380418	6470600	-	PROSER1	18		NC_046332.1	52301265	52320723	-	PROSER1	18
	NC_000013.11	39038311	39050109	+	NHLRC3	19		NC_000069.7	53371216	53389176	+	PROSER1	18		NC_009160.3	17536944	17548461	+	NHLRC3	19		NC_010453.5	14184124	14364844	+	NHLRC3	19		NC_037339.1	23178047	23219179	-	NHLRC3	19		NC_041747.1	6401973	6412056	+	NHLRC3	19		NC_046332.1	52321048	52330668	+	NHLRC3	19
	NC_000013.11	39342892	39603193	-	LHFPL6	20		NC_000069.7	53359417	53370679	-	NHLRC3	19		NC_009160.3	17805008	17834449	-	LHFPL6	20		NC_010453.5	14319420	14576130	-	LHFPL6	20		NC_037339.1	22796913	23031263	+	LHFPL6	20		NC_041747.1	6471554	6580339	-	LHFPL6	20		NC_046332.1	52465471	52604512	-	LHFPL6	20
	NC_000013.11	39655627	39791666	+	COG6	21		NC_000069.7	52948968	53169100	+	LHFPL6	20		NC_009160.3	17957735	18039537	+	COG6	21		NC_010453.5	14576194	14737836	+	COG6	21		NC_037339.1	22698375	22753140	-	COG6	21		NC_041747.1	6594541	6669056	+	COG6	21		NC_046332.1	52620312	52675711	+	COG6	21
	NC_000013.11	40555667	40666641	-	FOXO1	22		NC_000069.7	52889544	52924644	-	COG6	21		NC_009160.3	18754716	18844462	-	FOXO1	22		NC_010453.5	15317222	15410059	-	FOXO1	22		NC_037339.1	21900254	21993948	+	FOXO1	22		NC_041747.1	6954322	7033102	-	FOXO1	22		NC_046332.1	52928862	52993782	-	FOXO1	22
								NC_000069.7	52175758	52257530	+	FOXO1	22
	NC_000022.11	17085000	17115693	+	IL17RA	1									NC_009149.3	29007291	29030087	-	IL17RA	1		NC_010447.5	69461280	69480343	+	IL17RA	1		NC_037332.1	76001952	76018301	+	USP18	13		NC_041752.1	2224002	2238021	-	IL17RA	1		NC_047057.1	71981240	72004123	-	IL17RA	1
	NC_000022.11	17116297	17121360	-	CECR6	2		NC_000072.7	120440143	120460692	+	IL17RA	1		NC_009149.3	28991633	28996489	+	CECR6	2		NC_010447.5	69484204	69488489	-	CECR6	2		NC_037332.1	108807812	108823741	+	IL17RA	1		NC_041752.1	2219798	2220691	+	CECR6	2		NC_047057.1	71976503	71981242	+	CECR6	2
	NC_000022.11	17137520	17165287	-	HDHD5	3		NC_000072.7	120465900	120470907	-	CECR6	2		NC_009149.3	28955986	28977518	+	HDHD5	3		NC_010447.5	69499891	69512559	-	HDHD5	3		NC_037332.1	108826639	108830651	-	CECR6	2		NC_041752.1	2212907	2216869	+	HDHD5	3		NC_047057.1	71962033	71970327	+	HDHD5	3
	NC_000022.11	17178790	17221848	-	ADA2	4		NC_000072.7	120486453	120508319	-	HDHD5	3		NC_009149.3	28908454	28935638	+	ADA2	4		NC_010447.5	69526413	69554640	-	ADA2	4		NC_037332.1	108838769	108849971	-	HDHD5	3		NC_041752.1	2199174	2209874	+	ADA2	4		NC_047057.1	71935498	71957259	+	ADA2	4
	NC_000022.11	17359949	17558151	+	CECR2	5						ADA2	4		NC_009149.3	28655044	28815748	-	CECR2	5		NC_010447.5	69621871	69747730	+	CECR2	5		NC_037332.1	108855727	108878742	-	ADA2	4		NC_041752.1	2130288	2186344	-	CECR2	5		NC_047057.1	71807681	71908678	-	CECR2	5
	NC_000022.11	17563498	17590995	+	SLC25A18	6		NC_000072.7	120643275	120748152	+	CECR2	5		NC_009149.3	28633976	28648039	-	SLC25A18	6						SLC25A18	6		NC_037332.1	108937830	109054784	+	CECR2	5		NC_041752.1	2117103	2123866	-	SLC25A18	6						SLC25A18	6
	NC_000022.11	17592136	17628822	-	ATP6V1E1	7		NC_000072.7	120750527	120771297	+	SLC25A18	6		NC_009149.3	28609867	28632797	+	ATP6V1E1	7		NC_010447.5	69752644	69772038	-	ATP6V1E1	7						SLC25A18	6		NC_041752.1	2107687	2117140	+	ATP6V1E1	7		NC_047057.1	71785844	71796935	+	ATP6V1E1	7
	NC_000022.11	17628877	17730855	+	BCL2L13	8		NC_000072.7	120772205	120799659	-	ATP6V1E1	7		NC_009149.3	28515410	28603891	-	BCL2L13	8		NC_010447.5	69779290	69846638	+	BCL2L13	8		NC_037332.1	109061989	109075620	-	ATP6V1E1	7									NC_047057.1	71747459	71784087	-	BCL2L13	8
	NC_000022.11	17734138	17774665	-	BID	9		NC_000072.7	120813167	120869803	+	BCL2L13	8		NC_009149.3	28481595	28509113	+	BID	9		NC_010447.5	69849007	69874647	-	BID	9		NC_037332.1	109082115	109133400	+	BCL2L13	8		NC_041740.1	37439982	37471502	-	BCL2L13	8		NC_047057.1	71723894	71743706	+	BID	9
	NC_000022.11	17787649	18024561	-	MICAL3	10		NC_000072.7	120870080	120894074	-	BID	9		NC_009149.3	28267205	28466683	+	MICAL3	10		NC_010447.5	69887884	70132969	-	MICAL3	10		NC_037332.1	109135720	109154339	-	BID	9		NC_041740.1	37421170	37437041	+	BID	9		NC_047057.1	71557550	71720539	+	MICAL3	10
	NC_000022.11	18077990	18105396	+	PEX26	11		NC_000072.7	120908507	121150716	-	MICAL3	10		NC_009149.3	28205427	28215162	-	PEX26	11		NC_010447.5	70133024	70142515	+	PEX26	11		NC_037332.1	109159369	109316328	-	MICAL3	10		NC_041740.1	37296027	37414350	+	MICAL3	10		NC_047057.1	71535727	71541401	-	PEX26	11
	NC_000022.11	18110809	18131732	+	TUBA8	12		NC_000072.7	121160176	121175796	+	PEX26	11		NC_009149.3	28179797	28208435	-	TUBA8	12		NC_010447.5	70154251	70174001	+	TUBA8	12		NC_037332.1	109353623	109366058	+	PEX26	11		NC_041740.1	37250780	37258185	-	PEX26	11		NC_047057.1	71526436	71533104	-	TUBA8	12
	NC_000022.11	18150170	18177397	+	USP18	13		NC_000072.7	121187666	121209304	+	TUBA8	12		NC_009149.3	28115560	28170848	-	USP18	13		NC_010447.5	70183321	70227990	+	USP18	13		NC_037332.1	109374951	109393497	+	TUBA8	12		NC_041740.1	37235579	37244875	-	TUBA8	12		NC_047057.1	71508572	71522379	-	USP18	13
								NC_000072.7	121222865	121247876	+	USP18	13																							NC_041740.1	37214377	37231554	-	USP18	13
Chiroptera	Rousettus aegyptiacus	Begin	End	Strand	Symbol	Human order		Myotis myotis	Begin	End	Strand	Symbol	Human order		Molossus molossus	Begin	End	Strand	Symbol	Human order		Pipistrellus kuhlii	Begin	End	Strand	Symbol	Human order		Artibeus jamaicensis	Begin	End	Strand	Symbol	Human order		Phyllostomus discolor	Begin	End	Strand	Symbol	Human order		Rhinolophus ferrumequinum	Begin	End	Strand	Symbol	Human order
	NW_023416286.1	563262	590182	+	FGF9			NW_023416335.1	90165605	90278029	+	FOXO1	22		NW_023425403.1	98233714	98338374	+	FOXO1	22		NW_023425529.1	105459532	105563618	-	FOXO1	22		NW_026521745.1	1074228	1108210	+	FGF9			NC_040904.2	118565107	118605233	+	FGF9			NC_046287.1	105049994	105082444	+	FGF9
	NW_023416286.1	6697548	6776224	+	SACS			NW_023416335.1	91308487	91422278	-	COG6	21		NW_023425403.1	99472946	99620591	-	COG6	21		NW_023425529.1	104636573	104714973	+	COG6	21																NC_046287.1	96804858	96888703	-	SACS
	NW_023416286.1	10154624	10765756	+	NBEA	1		NW_023416335.1	91472247	91740816	+	LHFPL6	20		NW_023425403.1	99727539	100092929	+	LHFPL6	20		NW_023425529.1	104409980	104592237	-	LHFPL6	20		NW_026521823.1	36824455	36913030	+	FOXO1	22		NC_040913.2	5343635	5427809	-	FOXO1	22		NC_046287.1	94010240	94013150	+	MAB21L1	1
	NW_023416286.1	10591834	10593626	-	MAB21L1	1		NW_023416335.1	95053915	95131024	+	SACS			NW_023425403.1	103477073	103526255	+	SACS			NW_023425529.1	102225867	102277674	-	SACS			NW_026521823.1	37423117	37454071	-	COG6	21		NC_040913.2	4794126	4825275	+	COG6	21		NC_046287.1	93809973	94468631	-	NBEA	1
	NW_023416286.1	10834354	11139912	-	DCLK1	3		NW_023416335.1	98171047	99174031	+	NBEA	1		NW_023425403.1	106537554	107301260	+	NBEA	1		NW_023425529.1	100351016	100353404	+	MAB21L1	1		NW_026521823.1	37468706	37613203	+	LHFPL6	20		NC_040913.2	4628415	4778542	-	LHFPL6	20		NC_046287.1	93420701	93735847	+	DCLK1	3
	NW_023416286.1	11181136	11225396	-	SOHLH2	4		NW_023416335.1	98851412	98853751	-	MAB21L1	1		NW_023425403.1	107082360	107084791	-	MAB21L1	1		NW_023425529.1	100106453	100904687	-	NBEA	1		NW_026521823.1	38687926	38753696	+	SACS			NC_040913.2	3512322	3571851	-	SACS			NC_046287.1	93326010	93375167	+	SOHLH2	4
	NW_023416286.1	11303838	11353572	-	SPART	5		NW_023416335.1	99331570	99884630	-	DCLK1	3		NW_023425403.1	107407870	107769290	-	DCLK1	3		NW_023425529.1	99574678	99949003	+	DCLK1	3		NW_026521823.1	39960075	40399744	+	NBEA	1		NC_040913.2	1931562	1932906	+	MAB21L1	1		NC_046287.1	93213555	93258304	+	SPART	5
	NW_023416286.1	11533181	11541667	+	CCNA1	6		NW_023416335.1	100057596	100094546	+	HDHD5	3		NW_023425403.1	107871505	107934884	-	SOHLH2	4		NW_023425529.1	99412966	99499604	+	SOHLH2	4		NW_026521823.1	40258953	40261091	-	MAB21L1	1		NC_040913.2	1791805	2241329	-	NBEA	1		NC_046287.1	93149955	93161573	-	CCNA1	6
	NW_023416286.1	11744170	11748466	+	SERTM1	7		NW_023416335.1	100184931	100188757	+	CECR6	2		NW_023425403.1	108039208	108084394	-	SPART	5		NW_023425529.1	99327377	99407926	+	SPART	5		NW_026521823.1	40441916	40674570	-	DCLK1	3		NC_040913.2	1556103	1773468	+	DCLK1	3		NC_046287.1	92944804	92967800	-	SERTM1	7
	NW_023416286.1	11848186	11857093	+	RFXAP	8		NW_023416335.1	100201449	100228102	-	IL17RA	1		NW_023425403.1	108176397	108191829	+	CCNA1	6		NW_023425529.1	99262549	99291059	-	CCNA1	6		NW_026521823.1	40689534	40709534	-	SOHLH2	4		NC_040913.2	1522045	1536791	+	SOHLH2	4		NC_046287.1	92837823	92842883	-	RFXAP	8
	NW_023416286.1	11870102	11936338	-	SMAD9	9		NW_023416335.1	100693553	100697014	+	AMER3			NW_023425403.1	108399222	108399545	+	SERTM1	7						SERTM1	7		NW_026521823.1	40716268	40739570	-	SPART	5		NC_040913.2	1491359	1508280	+	SPART	5		NC_046287.1	92739748	92822917	+	SMAD9	9
	NW_023416286.1	11951379	11990324	-	ALG5	10		NW_023416335.1	100986824	101110011	-	ALG5	10		NW_023425403.1	108474346	108481136	+	RFXAP	8		NW_023425529.1	99172074	99199566	+	RFXAP	8		NW_026521823.1	40749613	40758734	+	CCNA1	6		NC_040913.2	1472610	1482579	-	CCNA1	6		NC_046287.1	92684223	92727489	+	ALG5	10
	NW_023416286.1	11990505	11996651	+	EXOSC8	11		NW_023416335.1	101109966	101119472	+	EXOSC8	11		NW_023425403.1	108508481	108533629	-	SMAD9	9		NW_023425529.1	99088469	99170169	+	SMAD9	9		NW_026521823.1	40805652	40808190	+	SERTM1	7		NC_040913.2	1431367	1431763	-	SERTM1	7		NC_046287.1	92677773	92684159	-	EXOSC8	11
	NW_023416286.1	11996564	12028668	-	SUPT20H	12		NW_023416335.1	101119404	101168663	-	SUPT20H	12		NW_023425403.1	108648458	108669262	-	NHLRC3	19		NW_023425529.1	99019355	99046193	+	NHLRC3	19		NW_026521823.1	40814493	40819616	+	RFXAP	8		NC_040913.2	1418002	1426975	-	RFXAP	8		NC_046287.1	92643775	92677858	+	SUPT20H	12
	NW_023416286.1	12601854	12636075	-	POSTN	13		NW_023416335.1	101924616	101975604	-	POSTN	13		NW_023425403.1	108670195	108721308	+	PROSER1	18		NW_023425529.1	98951510	99019179	-	PROSER1	18		NW_026521823.1	40827664	40852035	-	SMAD9	9		NC_040913.2	1396892	1426794	+	SMAD9	9		NC_046287.1	92185231	92220102	+	POSTN	13
	NW_023416286.1	12713041	12919124	-	TRPC4	14		NW_023416335.1	102048590	102116011	-	TRPC4	14						STOML3	17						STOML3	17		NW_026521823.1	40852039	40874702	-	ALG5	10		NC_040913.2	1367341	1382238	+	ALG5	10		NC_046287.1	91939237	92152108	+	TRPC4	14
	NW_023416286.1	13248556	13261248	+	UFM1	15		NW_023416335.1	102928562	102949441	+	UFM1	15		NW_023425403.1	108756479	109017983	-	FREM2	16		NW_023425529.1	98579231	98880743	+	FREM2	16		NW_026521823.1	40875753	40881884	+	EXOSC8	11		NC_040913.2	1360311	1366274	-	EXOSC8	11		NC_046287.1	91582713	91594622	-	UFM1	15
	NW_023416286.1	13569417	13778733	+	FREM2	16		NW_023416335.1	103239121	103567811	+	FREM2	16		NW_023425403.1	109306959	109323706	-	UFM1	15		NW_023425529.1	98390196	98409872	+	UFM1	15		NW_026521823.1	40881971	40910449	-	SUPT20H	12		NC_040913.2	1330675	1360208	+	SUPT20H	12		NC_046287.1	91109465	91273929	-	FREM2	16
	NW_023416286.1	13807414	13842114	-	STOML3	17						STOML3	17		NW_023425403.1	109772882	109951367	+	TRPC4	14		NW_023425529.1	97783707	98103550	-	TRPC4	14		NW_026521823.1	41041360	41070557	-	POSTN	13		NC_040913.2	1160103	1189681	+	POSTN	13		NC_046287.1	91069007	91091458	+	STOML3	17
	NW_023416286.1	13858744	13890000	-	PROSER1	18		NW_023416335.1	103644986	103714688	-	PROSER1	18		NW_023425403.1	109989135	110023385	+	POSTN	13		NW_023425529.1	97693212	97743522	-	POSTN	13		NW_026521823.1	41088801	41188109	-	TRPC4	14		NC_040913.2	1042959	1144607	+	TRPC4	14		NC_046287.1	91016123	91048541	+	PROSER1	18
	NW_023416286.1	13890062	13901441	+	NHLRC3	19		NW_023416335.1	103714907	103746973	+	NHLRC3	19		NW_023425403.1	110521089	110557110	+	SUPT20H	12		NW_023425529.1	97149440	97205155	-	SUPT20H	12		NW_026521823.1	41295331	41303288	+	UFM1	15		NC_040913.2	900431	907509	-	UFM1	15		NC_046287.1	91000033	91015786	-	NHLRC3	19
	NW_023416286.1	15809804	15893348	-	FOXO1	22		NW_023416335.1	103839003	103937323	+	SMAD9	9		NW_023425403.1	110557186	110563875	-	EXOSC8	11		NW_023425529.1	97140620	97149743	+	EXOSC8	11		NW_026521823.1	41358439	41459462	+	FREM2	16		NC_040913.2	763857	847920	-	FREM2	16		NC_046287.1	85194790	85282238	-	FOXO1	22
	NW_023416286.1	93024930	93190489	-	LHFPL6	20		NW_023416335.1	103998883	104015482	-	RFXAP	8		NW_023425403.1	110565690	110608240	+	ALG5	10		NW_023425529.1	97032538	97140037	-	ALG5	10						STOML3	17						STOML3	17		NC_046287.1	4841091	5059032	+	LHFPL6	20
	NW_023416286.1	93215162	93254165	+	COG6	21						SERTM1	7									NW_023425529.1	96728967	96732514	+	AMER3			NW_026521823.1	41464821	41487173	-	PROSER1	18		NC_040913.2	728980	753547	+	PROSER1	18		NC_046287.1	4757686	4810548	-	COG6	21
								NW_023416335.1	104056982	104078089	-	CCNA1	6		NW_023425345.1	105002531	105004894	-	AMER3			NW_023425529.1	96421577	96455226	-	HDHD5	3		NW_026521823.1	41488096	41500351	+	NHLRC3	19		NC_040913.2	717277	728743	-	NHLRC3	19
	NW_023416295.1	93294835	93317153	-	IL17RA	1		NW_023416335.1	104099067	104166316	+	SPART	5		NW_023425345.1	105505265	105538244	+	IL17RA	1		NW_023425529.1	96320761	96325695	-	CECR6	2		NW_026521823.1	41582860	41585153	-	AMER3			NC_040913.2	639490	642238	+	AMER3			NC_046293.1	90673265	90694353	+	IL17RA	1
	NW_023416295.1	93285417	93290308	+	CECR6	2		NW_023416335.1	104215604	104354848	+	SOHLH2	4		NW_023425345.1	105544668	105546422	-	CECR6	2		NW_023425529.1	96287125	96315858	+	IL17RA	1		NW_026521823.1	41645206	41661054	+	IL17RA	1		NC_040913.2	567219	582779	-	IL17RA	1		NC_046293.1	90699538	90706015	-	CECR6	2
	NW_023416295.1	93237908	93254121	+	HDHD5	3		NW_023416335.1	104358770	104414918	-	USP18	13		NW_023425345.1	105572131	105592481	-	HDHD5	3		NW_023425529.1	96235397	96245050	-	PEX26	11		NW_026521823.1	41666478	41670863	-	CECR6	2		NC_040913.2	557973	559859	+	CECR6	2		NC_046293.1	90739523	90755417	-	HDHD5	3
	NW_023416295.1	93191243	93220173	+	ADA2	4		NW_023416335.1	104525693	104546375	-	TUBA8	12		NW_023425345.1	105622193	105669017	-	ADA2	4		NW_023425529.1	96167608	96242206	-	TUBA8	12		NW_026521823.1	41678552	41696914	-	HDHD5	3		NC_040913.2	539764	551638	+	HDHD5	3		NC_046293.1	90780149	90842952	-	ADA2	4
	NW_023416295.1	92966764	93091559	-	CECR2	5		NW_023416335.1	104586310	104595450	-	PEX26	11		NW_023425345.1	105817045	105989576	+	CECR2	5		NW_023425529.1	96058985	96139936	-	USP18	13		NW_026521823.1	41701825	41724689	-	ADA2	4		NC_040913.2	507627	532837	+	ADA2	4		NC_046293.1	90914807	91069008	+	CECR2	5
	NW_023416295.1	92940895	92949238	-	SLC25A18	6		NW_023416335.1	104725829	104995165	+	MICAL3	10		NW_023425345.1	106004045	106023185	+	SLC25A18	6		NW_023425529.1	95707942	95970504	-	MICAL3	10		NW_026521823.1	41771456	41860964	+	CECR2	5		NC_040913.2	382384	461740	-	CECR2	5		NC_046293.1	91075642	91098859	+	SLC25A18	6
	NW_023416295.1	92918374	92939313	+	ATP6V1E1	7		NW_023416335.1	105016160	105070599	+	BID	9		NW_023425345.1	106024104	106052302	-	ATP6V1E1	7		NW_023425529.1	95626673	95698823	-	BID	9		NW_026521823.1	41863713	41871948	+	SLC25A18	6		NC_040913.2	368341	375541	-	SLC25A18	6		NC_046293.1	91100370	91122838	-	ATP6V1E1	7
	NW_023416295.1	92824432	92909977	-	BCL2L13	8		NW_023416335.1	105040069	105271267	-	BCL2L13	8		NW_023425345.1	106056093	106203788	+	BCL2L13	8		NW_023425529.1	95478023	95626553	+	BCL2L13	8		NW_026521823.1	41872115	41885322	-	ATP6V1E1	7		NC_040913.2	354200	367403	+	ATP6V1E1	7		NC_046293.1	91132642	91219871	+	BCL2L13	8
	NW_023416295.1	92787216	92824201	+	BID	9		NW_023416335.1	105286269	105351016	+	ATP6V1E1	7		NW_023425345.1	106188655	106230382	-	BID	9		NW_023425529.1	95408959	95462652	-	ATP6V1E1	7		NW_026521823.1	41886735	41932765	+	BCL2L13	8		NC_040913.2	304047	349868	-	BCL2L13	8		NC_046293.1	91220849	91263412	-	BID	9
	NW_023416295.1	92588108	92775136	+	MICAL3	10		NW_023416335.1	105351634	105392219	-	SLC25A18	6		NW_023425345.1	106248375	106366246	-	MICAL3	10		NW_023425529.1	95364822	95406991	+	SLC25A18	6		NW_026521823.1	41935774	41958013	-	BID	9		NC_040913.2	278304	300209	+	BID	9		NC_046293.1	91271547	91491094	-	MICAL3	10
	NW_023416295.1	92508935	92518214	-	PEX26	11		NW_023416335.1	105402151	105635617	-	CECR2	5		NW_023425345.1	106560599	106568113	+	PEX26	11		NW_023425529.1	95154221	95358326	+	CECR2	5		NW_026521823.1	41967481	42092381	-	MICAL3	10		NC_040913.2	134526	267809	+	MICAL3	10		NC_046293.1	91561898	91571070	+	PEX26	11
	NW_023416295.1	92476441	92493341	-	TUBA8	12						ADA2	4		NW_023425345.1	106585002	106608504	+	TUBA8	12						ADA2	4		NW_026521823.1	42136405	42144106	+	PEX26	11		NC_040913.2	80556	88188	-	PEX26	11		NC_046293.1	91590416	91612471	+	TUBA8	12
	NW_023416295.1	92428705	92454320	-	USP18	13		NW_023416335.1	107705827	107762456	-	FGF9			NW_023425345.1	106645874	106701554	+	USP18	13		NW_023425529.1	93449132	93512592	+	FGF9			NW_026521823.1	42146372	42158914	+	TUBA8	12		NC_040913.2	63994	77946	-	TUBA8	12		NC_046293.1	91630884	91690161	+	USP18	13
	NW_023416295.1	92176086	92187054	+	AMER3										NW_023425345.1	108028285	108087246	-	FGF9										NW_026521823.1	42172734	42182096	+	USP18	13		NC_040913.2	42094	53316	-	USP18	13		NC_046293.1	91939255	91951257	+	AMER3

[truncated: 18 more columns]

## Sheet: assembly statistics
Species	Lasiurus cinereus	Eptesicus fuscus	Myotis myotis	Molossus molossus	Artibeus jamaicensis	Pipistrellus kuhlii	Phyllostomus discolor	Rousettus aegyptiacus	Rhinolophus ferrumequinum
Source	DNAZoo	NCBI RefSeq	NCBI RefSeq	NCBI RefSeq	NCBI RefSeq	NCBI RefSeq	NCBI RefSeq	NCBI RefSeq	NCBI RefSeq
Karyotype n	14	25	22	24	15	22	16	18	29
Genome accession	https://www.dnazoo.org/assemblies/aeorestes_cinereus	GCA_027574615.1	GCF_014108235.1	GCF_014108415.1	GCF_021234435.1	GCF_014108245.1	GCF_004126475.2	GCF_014176215.1	GCF_004115265.2
Genome size	2.1 Gb	2 Gb	2 Gb	2.3 Gb	2.1 Gb	1.8 Gb	2.1 Gb	1.9 Gb	2.1 Gb
Total ungapped length	2.1 Gb	2 Gb	2 Gb	2.3 Gb	2.1 Gb	1.8 Gb	2.1 Gb	1.9 Gb	2.1 Gb
Number of scaffolds	1520	48	92	60	867	202	77	29	134
Scaffold N50	201.3 Mb	102.8 Mb	94.4 Mb	110.7 Mb	22.1 Mb	80.2 Mb	171.7 Mb	113.8 Mb	88 Mb
Scaffold L50	5	9	7	9	28	7	6	7	11
Number of contigs	35720	123	630	409	870	596	953	271	289
Contig N50	120.6 Kb	49 Mb	12.5 Mb	22.2 Mb	22.1 Mb	10.6 Mb	6.9 Mb	22 Mb	31.9 Mb
Contig L50	5188	13	41	30	28	43	94	25	22
GC percent	42	43.5	43	42.5	42	42.5	42.5	40	40.5
Genome coverage	42.0X	95.0x	90.9x	58.3x	60.0x	80.8x	65.8x	64.6x	52.8x
Species	Homo sapiens	Mus musculus	Corvus cornix	Monodelphis domestica	Ornithorhynchus anatinus	Ochotona princeps	Sus scrofa	Bos taurus	Equus caballus	Felis catus
Source	NCBI RefSeq	NCBI RefSeq	NCBI RefSeq	NCBI RefSeq	NCBI RefSeq	NCBI RefSeq	NCBI RefSeq	NCBI RefSeq	NCBI RefSeq	NCBI RefSeq
Karyotype n	24	21	29	10	31	35	20	31	32	19
Genome accession	GCF_000001405.40	GCF_000001635.27	GCF_000738735.6	GCF_027887165.1	GCF_004115215.2	GCF_030435755.1	GCF_000003025.6	GCF_002263795.3	GCF_002863925.1	GCF_018350175.1
Genome size	3.1 Gb	2.7 Gb	1 Gb	3.6 Gb	1.9 Gb	2.6 Gb	2.5 Gb	2.8 Gb	2.5 Gb	2.4 Gb
Total ungapped length	2.9 Gb	2.7 Gb	1 Gb	3.6 Gb	1.8 Gb	2.6 Gb	2.5 Gb	2.8 Gb	2.5 Gb	2.4 Gb
Number of scaffolds	470	101	46	13	321	5864	705	1957	4700	70
Scaffold N50	67.8 Mb	106.1 Mb	73.7 Mb	538.3 Mb	83.3 Mb	74 Mb	88.2 Mb	103.3 Mb	87.2 Mb	148.5 Mb
Scaffold L50	16	11	5	3	7	12	9	12	12	7
Number of contigs	996	305	471	2268	833	6296	1117	2343	10986	109
Contig N50	57.9 Mb	59.5 Mb	8.6 Mb	3.9 Mb	15.1 Mb	12.2 Mb	48.2 Mb	26.4 Mb	1.5 Mb	90.7 Mb
Contig L50	18	15	33	244	36	51	15	32	462	10
GC percent	41	42	42	38	46	44	42	42	41.5	42
Genome coverage	NA	NA	150.0x	32.9x	58.8x	30.0x	65.0x	NA	88.0x	76.0x
